1 **Proxy gene-by-environment Mendelian randomization study confirms a causal effect of maternal**  
2 **smoking on offspring birthweight, but little evidence of long-term influences on offspring health**

3 Qian Yang (0000-0001-8778-4132),<sup>1,2</sup> Louise A C Millard (0000-0003-4787-8411),<sup>1,2,3</sup> George Davey  
4 Smith (0000-0002-1407-8314)<sup>1,2</sup>

5 Medical Research Council Integrative Epidemiology Unit at the University of Bristol, Bristol, BS8 2BN,  
6 UK, Population Health Sciences, Bristol Medical School, University of Bristol, Bristol, BS8 2BN, UK

7 Qian Yang PhD student George Davey Smith Professor Medical Research Council Integrative

8 Epidemiology Unit at the University of Bristol, Bristol, BS8 2BN, UK, Population Health Sciences,

9 Bristol Medical School, University of Bristol, Bristol, BS8 2BN, UK, Intelligent Systems Laboratory,

10 Department of Computer Science, University of Bristol, Bristol, BS8 1UB, UK, Louise A C Millard Vice-

11 Chancellor's Research Fellow

12

13 Correspondence to

14 Q Yang

15 OF28, Oakfield House, Oakfield Grove, Clifton, Bristol, BS8 2BN, UK

16 Email: [qian.yang@bristol.ac.uk](mailto:qian.yang@bristol.ac.uk)

17 LAC Millard and G Davey Smith contributed equally.

18

19 Key Words: gene × environment, Mendelian randomization, proxy, maternal smoking, pregnancy

20 **Abstract**

21 **Objective** To validate a novel proxy gene-by-environment (G×E) Mendelian randomization (MR)  
22 approach by replicating the previously established effect of maternal smoking heaviness in  
23 pregnancy on offspring birthweight, and then use G×E MR to investigate the effect of smoking  
24 heaviness in pregnancy on offspring health outcomes in later life and grandchild's birthweight.

25 **Design** A proxy G×E MR using participants' genotype (i.e. rs16969968 in *CHRNA5*) as a proxy for their  
26 mother's genotype.

27 **Setting** UK Biobank.

28 **Participants** 289,684 white British men and women aged 40-69 in UK Biobank.

29 **Main outcome measures** Participants' birthweight and later life outcomes (height, body mass index,  
30 lung function, asthma, blood pressure, age at menarche, years of education, fluid intelligence score,  
31 depression/anxiety, happiness), and birthweight of female participants' first child.

32 **Results** In our proof of principle analysis, each additional smoking-increasing allele was associated  
33 with a 0.018 (95% confidence interval (CI): -0.026, -0.009) kg lower birthweight in the "maternal  
34 smoking during pregnancy" stratum, but no meaningful effect (-0.002kg; 95% CI: -0.008, 0.003) in  
35 the "maternal non-smoking during pregnancy" stratum (interaction P-value=0.004). We found little  
36 evidence of an effect of maternal smoking heaviness on participants' later life outcomes. We found  
37 the differences in associations of rs16969968 with grandchild's birthweight between grandmothers  
38 who did versus did not smoke were heterogeneous (interaction P-value=0.042) among female  
39 participants who did (-0.020kg per allele; 95% CI: -0.044, 0.003) versus did not (0.007kg per allele;  
40 95% CI: -0.005, 0.020) smoke in pregnancy.

41 **Conclusions** Our study demonstrated how offspring genotype can be used to proxy for mothers'  
42 genotype in G×E MR. We confirmed the previously established causal effect of maternal smoking on  
43 offspring birthweight but found little evidence of an effect on long-term health outcomes in the

44 offspring. For grandchild's birthweight, the effect of grandmother's smoking heaviness in pregnancy

45 may be modulated by maternal smoking status in pregnancy.

46 (word count: 300)

47 **WHAT IS ALREADY KNOWN TO THIS TOPIC**

48 Heavier maternal smoking in pregnancy causes lower offspring birthweight

49 Maternal smoking in pregnancy is also associated with offspring outcomes in later life and

50 grandchild's birthweight, but it is not known whether these associations are causal

51 Understanding the transgenerational causal effects of maternal smoking heaviness in pregnancy is

52 important to inform public health policies

53 **WHAT THIS STUDY ADDS**

54 The proxy gene-by-environment Mendelian randomization approach can be used to explore

55 maternal effects on offspring phenotypes when maternal genetic information is unavailable

56 The approach confirmed the causal effect of smoking on offspring birthweight.

57 Maternal smoking status in pregnancy modulates the effect of grandmother's smoking heaviness in

58 pregnancy on grandchild's birthweight, highlighting the importance of smoking cessation before

59 pregnancy in each generation

## 60 **Introduction**

61 The developmental origins of health and disease hypothesis proposes that early life experiences,  
62 including those in utero, can have long-term health effects, and maternal pregnancy exposures are  
63 important to long-term health of offspring (1). Heavier maternal smoking in pregnancy is known to  
64 be causally associated with lower offspring birthweight (2-6), but its other effects in offspring are  
65 less clear. Multivariable regression in observational data showed that heavier maternal smoking  
66 during pregnancy was associated with offspring being shorter (7) and more overweight/obese (8, 9),  
67 and having higher blood pressure (10), but had mixed associations with age at menarche (11),  
68 respiratory (12), cognitive (13), and mental health (14). Heavier maternal smoking in pregnancy has  
69 also been associated with higher grandchild's birthweight in certain subpopulations (15-17). It is  
70 unclear whether these associations reflect a causal effect of maternal smoking in pregnancy, as they  
71 may be due to residual confounding. Some studies have assessed this using paternal smoking as a  
72 'negative control' since an effect via uterine environment would be observed in mothers but not  
73 fathers, such that similar-magnitude associations would indicate confounding via shared familial,  
74 social, environmental and genetic factors (2, 5, 18). Negative control studies suggest little evidence  
75 of a causal effect on offspring body mass index (BMI) (2, 5, 8), blood pressure (19, 20) and  
76 depression (21).

77 Mendelian randomization (MR) provides an alternative way to explore this question by using single  
78 nucleotide polymorphisms (SNPs) as instrumental variables (IVs) for an exposure of interest. MR is  
79 less prone to confounding as germline genetic variants are randomly allocated at meiosis and not  
80 influenced by subsequent socioeconomic and health behaviours (22, 23). MR has been applied in a  
81 gene-by-environment (G×E) framework (24, 25), which requires variation in the strength of the  
82 gene-exposure association across strata of another factor. If there is a causal effect of the IV on the  
83 outcome via the exposure of interest, then we would expect the association of the IV with the  
84 outcome to vary in proportion to the gene-exposure association. The rs1051730/rs16969968

85 (*CHRNA5*) SNPs, previously robustly associated with smoking heaviness amongst smokers (26), have  
86 been widely used as IVs for smoking heaviness in GxE MR studies (3, 27-29). A causal effect of the  
87 smoking heaviness IV on an outcome should be seen amongst ever but not amongst never smokers  
88 if the effect is via smoking heaviness rather than other pathways (24, 25). GxE MR has also been  
89 used to assess cross-generational causal effects. A smoking heaviness IV has been associated with  
90 lower offspring birthweight amongst mothers who smoked in pregnancy but not amongst mothers  
91 who did not smoke in pregnancy, suggesting the genetic instrument affects birthweight through  
92 maternal smoking (3).

93 It is usually difficult to investigate transgenerational associations due to a lack of data across the  
94 generations of interest. Thus, previous work has sought to test transgenerational associations using  
95 available traits as proxies for unmeasured traits of interest. A Norwegian cohort aimed to examine  
96 whether women's smoking in adulthood was related to their mothers' smoking habits (that were not  
97 recorded) and hence used maternal smoking-related mortality as a proxy (30). Recently, a case-  
98 control by proxy approach has been proposed (31). Participants' genotypes were used to proxy  
99 unavailable parental genotypes, and their associations were tested against parental diagnosis of  
100 Alzheimer's disease in UK Biobank (31), since Alzheimer's disease was much more prevalent in the  
101 parents than the participants (aged between 40 and 69 at baseline in 2006-2010 (32)). Our study  
102 aimed to demonstrate how an analogous approach can be used within a GxE MR framework to test  
103 maternal-offspring effects when maternal genotype is not available, using offspring genotype as a  
104 proxy for the maternal genotype. First, we performed a proof of principle analysis to demonstrate  
105 this approach, testing the previously established finding that maternal smoking in pregnancy leads to  
106 lower offspring birthweight. Second, we tested for causal effects of maternal smoking on offspring  
107 later life outcomes. Finally, we tested for a causal effect of grandmother's smoking on grandchild's  
108 birthweight.

## 109 **Methods**

### 110 *Study population*

111 Our study was conducted using UK Biobank, a population-based cohort of more than 500,000 men  
112 and women in the UK. This study collected a large and diverse range of data from physical measures,  
113 questionnaires and hospital episode statistics (32). Of 463,013 participants of European descent with  
114 genetic data passing initial quality control (i.e. genetic sex same as reported sex, XX or XY in sex  
115 chromosome and no outliers in heterozygosity and missing rates) (33), 289,684 participants (54%  
116 women) of white British descent were eligible for inclusion in our analyses (Supplementary Figure 1).  
117 We refer to the UK Biobank participants as generation one (G1), and their parents and offspring as  
118 G0 and G2, respectively.

### 119 *Genetic IV for maternal smoking*

120 The rs16969968 SNP located in *CHRNA5* has been robustly associated with smoking heaviness (26).  
121 Ideally, we would use the maternal rs16969968 as an IV for the heaviness of maternal smoking, but  
122 in UK Biobank parental genetic data are not available. Hence, we used rs16969968 of the UK Biobank  
123 participants as a proxy for that of their mothers', coded as the number of smoking heaviness  
124 increasing alleles.

### 125 *Smoking phenotypes*

126 We used participants' answers to the question "Did your mother smoke regularly around the time  
127 when you were born?" as a proxy for G0 smoking during pregnancy. Participants were also asked to  
128 report their smoking status (current/former/never). We derived a binary ever versus never measure  
129 of smoking status by combining current and former smokers. For female participants with at least  
130 one live birth, we derived a measure denoting whether they smoked during the pregnancy of their  
131 first child (see Supplementary Methods).

### 132 *Outcomes in participants (G1)*

133 We used baseline data measured at the UK Biobank initial assessment center. Anthropometric traits  
134 included participants' birthweight (kg, self-reported), standing height (cm) and BMI (kg/m<sup>2</sup>,  
135 constructed from standing height and weight). To assess lung function, forced vital capacity (L) and  
136 forced expiratory volume in 1-second (L) were measured by spirometry. Participants reported  
137 whether they had had asthma via the question "Has a doctor ever told you that you have had any of  
138 the following conditions?" (with an option of asthma) (34). Systolic and diastolic blood pressure  
139 (mmHg) were measured twice using a digital monitor or a manual sphygmomanometer if the digital  
140 monitor could not be employed, and we took the average of the two readings. Female participants  
141 reported their age at menarche. We derived years of education based on qualifications achieved by  
142 participants, as described previously (35). We included follow-up data of a subset of participants to  
143 define intelligence and depression/anxiety. Fluid intelligence score was generated as an unweighted  
144 sum of the number of correct answers given to 13 questions, and we used the earliest score if we  
145 had data at multiple time points (36). We defined depression/anxiety cases as participants that  
146 either answered "Yes" to "Have you ever seen a general practitioner (GP) for nerves, anxiety, tension  
147 or depression?" or "Have you ever seen a psychiatrist for nerves, anxiety, tension or depression?",  
148 or had hospital episode coded using ICD-10 (37). Happiness was assessed via a question – "In general  
149 how happy are you?", with six categories ranging from "extremely happy" to "extremely unhappy".

#### 150 *Outcomes in participants' offspring (G2)*

151 The female participants with at least one live birth were asked to report their first child's  
152 birthweight. Male participants were not asked to report the birthweight of their offspring.

#### 153 *Statistical analyses*

154 *Proof of principle analysis: testing the causal effect of maternal (G0) smoking heaviness in pregnancy*  
155 *on participants' (G1) birthweight*

156 In this proof of principle analysis, we seek to replicate the finding, previously established using GxE



157 MR and many other methods (6), that heavier maternal smoking causes lower offspring birthweight.  
158 We use our proxy GxE approach, where participants' (G1) genotype is used as a proxy for their  
159 mothers' (G0) genotype. To assess whether rs16969968 affects participants' birthweight via G0  
160 smoking in pregnancy, we stratified our G1 sample by G0 smoking status during pregnancy, and then  
161 tested the associations of rs16969968 with birthweight in each stratum using multivariable linear  
162 regression. Since birth precedes smoking initiation, participants' genotype cannot affect birthweight  
163 through their own smoking heaviness, which means we do not need to consider smoking status of  
164 participants (Figure 1A). We included participants' sex as a covariate to reduce variation in their  
165 birthweight and the first ten principal components to control for population stratification. We  
166 assumed an additive genetic effect and identified the strength of interaction between strata using  
167 Cochran's Q test for heterogeneity.

168 *Testing for causal effects of G0 smoking in pregnancy on G1 later life outcomes*

169 We use the proxy GxE MR approach to test for causal effects of maternal (G0) smoking heaviness on  
170 offspring (G1) height, BMI, lung function, asthma, blood pressure, age at menarche, education,  
171 intelligence, depression/anxiety and happiness. In contrast to our proof of principle example where  
172 participants smoking in adulthood cannot influence their birthweight, participants' rs16969968  
173 could affect these outcomes via both maternal (G0) and participants' (G1) smoking heaviness (Figure  
174 1B). To assess whether rs16969968 may affect these outcomes via maternal versus participants'  
175 smoking, we stratified on both maternal and participants' smoking status. In each stratum, we  
176 examined associations of rs16969968 with height, BMI, lung function, blood pressure, age at  
177 menarche, education and intelligence using linear regression, asthma and depression/anxiety using  
178 logistic regression, and happiness using ordinal logistic regression. We included participants' age at  
179 baseline, sex and the first ten genetic principal components as covariates.

180 Height and age at menarche manifest around the time of puberty such that participants' own  
181 smoking can only affect these if they started smoking before these outcomes are determined. We

182 conducted sensitivity analyses for these outcomes stratifying G1 participants according to whether  
183 they were ever smokers before achieving their adulthood height (assuming age at 17 for men and 15  
184 for women (38)) or their age at menarche.

#### 185 *Testing for causal effects of G0 smoking in pregnancy on grandchild's (G2) birthweight*

186 To test for a causal effect of participants mothers' smoking on birthweight of participants' offspring,  
187 we stratified G1 women based on their own and their mothers' smoking status during pregnancy, as  
188 rs16969968 could affect G2 birthweight through both G0 and G1 smoking heaviness (Figure 1C).

189 Within each stratum, we assessed associations of rs16969968 with G2 birthweight using linear  
190 regression, adjusting for the first ten genetic principal components. We estimated the strength of  
191 interaction between G0 smokers and G0 non-smokers within each G1 stratum. We also calculated a  
192 difference (39) in those associations between G0 smokers and G0 non-smokers within each G1  
193 stratum, and estimated the strength of interaction between two differences to investigate whether  
194 G1 smoking status modulates the effect of rs16969968 on G2 birthweight.

195 Our  $G \times E$  MR may be vulnerable to collider bias (29, 40, 41), as we stratified on smoking status  
196 (Supplementary Figure 2). Therefore, we tested associations of rs16969968 with G0 and G1 smoking  
197 status and potential confounders available in UK Biobank (see Supplementary Methods). We also  
198 tested observational associations of maternal (G0) smoking status with offspring (G1) smoking status  
199 and all outcomes for comparison with our MR results. Analyses were performed using R version  
200 3.5.1 (R Foundation for Statistical Computing, Vienna, Austria).

#### 201 *Patient and public involvement*

202 The current research was not informed by patient and public involvement because it used secondary  
203 data. However, future research following on from our findings should be guided by patient and  
204 public opinions.

## 205 Results

206 Characteristics of participants across sex are shown in Supplementary Table 1. Each additional  
207 smoking-increasing allele of participants' rs16969968 was associated with a 1.02 (95% confidence  
208 interval [CI]: 1.01, 1.03; P-value =  $5 \times 10^{-3}$ ) higher odds of their mothers' smoking in pregnancy, a 0.98  
209 (95% CI: 0.97, 0.99; P-value =  $7 \times 10^{-4}$ ) lower odds of being an ever (versus never) smoker themselves,  
210 and a 1.06 (95% CI: 1.04, 1.09; P-value =  $3 \times 10^{-7}$ ) higher odds that female participants were a smoker  
211 (versus non-smoker) in their own pregnancy. We found little evidence of an association between  
212 rs16969968 and potential confounders, with small associations for participants' age and years of  
213 education in some strata (Supplementary Table 2).

214 Our proof of principle analysis found that, amongst participants whose mothers smoked in  
215 pregnancy, each additional smoking-increasing allele was associated with a 0.018kg lower  
216 birthweight (95% CI: -0.026, -0.009) after adjustment for covariates (Figure 2). Amongst participants  
217 whose mothers did not smoke in pregnancy, we found little evidence for an association of  
218 rs16969968 with birthweight (-0.002kg [95% CI: -0.008, 0.003]), and we observed heterogeneity  
219 between these associations (interaction P-value = 0.004).

220 Figure 3 showed estimates of rs16969968 on the 12 outcomes in the UK Biobank participants.

221 Overall, within each stratum, the estimates were broadly consistent between those whose mothers  
222 smoked and those whose mothers did not, except for height among participants who never smoked  
223 (all interaction P-values were in Supplementary Table 3). Each additional smoking-increasing allele  
224 was associated with a 0.115cm lower height (95% CI: -0.200, -0.030) among never smokers whose  
225 mothers smoked in pregnancy, but a 0.002cm lower height (95% CI: -0.057, 0.053) among never  
226 smokers whose mothers did not smoke in pregnancy (interaction P-value = 0.029). However, this  
227 difference was not observed amongst ever smokers (Figure 3A). We obtained largely consistent  
228 results in sensitivity analyses (Supplementary Figure 3).

229 Figure 4 showed estimates of rs16969968 on grandchild's birthweight. Among female participants

230 who did not smoke in pregnancy, each additional smoking-increasing allele was associated with a  
231 0.007kg higher grandchild's birthweight difference (95% CI: -0.005, 0.020) between grandmothers  
232 who did versus did not smoke in pregnancy. However, this difference was -0.020kg per allele (95%  
233 CI: -0.044, 0.003) among female participants who smoked in pregnancy. These two differences were  
234 heterogeneous (-0.028kg per allele [95% CI: -0.055, -0.001]; interaction P-value=0.042).

235 The directions of observational estimates were consistent with our MR estimates for both  
236 participants' and their child's birthweight. Our observational analyses also found associations of  
237 maternal smoking in pregnancy with offspring later life outcomes, where smoking in pregnancy was  
238 associated with lower height, higher BMI, poorer lung function, higher risk of asthma, earlier age at  
239 menarche, higher blood pressure, and poorer cognitive and mental health (Supplementary Table 4).

## 240 **Discussion**

### 241 *Principle findings and comparison with the literature*

242 In this study, we have demonstrated how G×E MR can be used to test transgenerational causal  
243 effects of maternal smoking heaviness in pregnancy using participants' genotype as a proxy for their  
244 mothers' genotype. Our proof of principle analysis identified an effect of heavier maternal smoking  
245 on lower offspring birthweight, consistent with previous studies (2-6). Our MR study also confirmed  
246 previously established causal effects of participants' smoking on their own health, where heavier  
247 smoking reduced BMI (27) and lead to impaired lung function (42), but found little evidence of an  
248 effect on asthma risk (43) or blood pressure (28).

249 Our tests of effects of maternal smoking heaviness on offspring later life health outcomes were not  
250 conclusive, given a lack of precision for many of our MR estimates. We found little evidence of an  
251 effect on BMI, lung function, asthma, blood pressure, cognition, depression/anxiety or happiness.  
252 These findings were consistent with negative control studies for BMI (2, 8), blood pressure (19, 20)  
253 and depression/anxiety (21), although our estimation of interactions is not directly quantitatively  
254 comparable to their estimation of effects of ever/never smoking or smoking heaviness categories in  
255 observational studies. Our MR results found little evidence to support findings from our own and  
256 previous observational studies indicating maternal smoking led to poorer lung function (44), higher  
257 risk of asthma (45, 46), and lower happiness in offspring (47). This may be due to residual  
258 confounding in observational associations, or because of low statistical power in MR. Previous  
259 studies did not use the same cognition measurement approaches as used UK Biobank, making our  
260 results for this outcome less comparable. We observed lower offspring adulthood height according  
261 to maternal smoking in never smokers but not in ever smokers, which could be a chance finding  
262 given we tested multiple outcomes.

263 We found little evidence of an effect of maternal smoking in pregnancy on offspring age at  
264 menarche. However, we did find an effect of rs16969968 on age at menarche across strata of

265 smoking status (of both the participant and participants' mother) suggesting that rs16969968 may  
266 have horizontal pleiotropic effects on age at menarche (e.g. via smoking outside of pregnancy).  
267 Future MR studies could examine this (25).

268 Our observational results were consistent with previous observational studies (15-17) by showing a  
269 positive association of grandmother's (G0) smoking in pregnancy with grandchild's (G2) birthweight  
270 after adjusting for mother's (G1) smoking in pregnancy. Although our G×E MR was vulnerable to  
271 insufficient statistical power, we did find evidence that female G1 smoking in pregnancy modulates  
272 the effect of G0 smoking heaviness in pregnancy on G2 birthweight, consistent with previous  
273 observational findings (15-17). These results highlight the importance of both grandmother's and  
274 maternal smoking in pregnancy for fetal growth, which could have implications for public health  
275 interventions aiming to reduce the prevalence of low birthweight.

#### 276 *Strength of weakness of this study*

277 We now discuss some limitations of this work. First, our proxy G×E MR used offspring genotype as a  
278 proxy for maternal genotype and offspring rs16969968 contains 50% information from fathers. This  
279 may cause regression dilution bias in each stratum, where the measurement error in the SNP biases  
280 associations towards the null (48). However, we checked the extent that this might affect our  
281 results, by comparing the associations of participant's rs16969968 with their own birthweight versus  
282 their child's birthweight for smokers during pregnancy, and found little difference (-0.005kg (95% CI:  
283 -0.020, 0.009)) between them. Second, we stratified on smoking status which rs16969968 was  
284 weakly associated with. Stratification on colliders (between rs16969968 and outcomes) may bias our  
285 MR estimates (see Supplementary Figure 2) (40, 41). Additionally, we used a highly selected sample  
286 related to smoking (49) and had missing data in outcomes. These may also make our MR estimates  
287 vulnerable to selection bias (50). However, previous evidence (29, 51) and our genetic associations  
288 with measured confounders indicated that these selection effects may not be large enough to have a  
289 considerable impact on our MR estimates. Third, rs16969968 predicts life-course smoking heaviness

290 and not just in pregnancy. Women who smoked in pregnancy may also smoke outside of pregnancy.  
291 Therefore, the effect of maternal smoking might be via other pathways such as poor oocyte quality  
292 for offspring birthweight, or postnatal maternal smoking (e.g. passive smoke exposure) for  
293 adulthood outcomes among offspring (52).

294 Fourth, both participants' and their mothers' (G0) smoking status may be misclassified. Participants  
295 were asked to report whether their mother smoked around the time of their birth and we used this  
296 as our measure of G0 smoking in pregnancy. This means that G0 smokers might have smoked during  
297 all their pregnancy, part of their pregnancy or started smoking shortly after giving birth. Effects of  
298 smoking heaviness in pregnancy may vary according to the duration and pregnancy period during  
299 which a woman smoked. For instance, previous work found that smoking in the first trimester was  
300 not associated with lower birthweight in offspring suggesting that later stages may be more  
301 important for fetal growth (3, 15). Similarly, participants reported their smoking status at baseline,  
302 but this may not reflect their smoking status at an important time point for a given outcome. For,  
303 instance, participants' height and age at menarche can only be affected by their own smoking  
304 behaviour if they started smoking before achieving adult height or the onset of puberty. We  
305 performed sensitivity analyses for height and age at menarche using estimates of participants  
306 smoking status before these outcomes. For height, this assumed that men and women achieved  
307 their adult height at 17 and 15 years old (38), respectively, as this information was not available in  
308 UK Biobank. Fifth, we tested several hypotheses which increases the probability that our identified  
309 associations may be due to chance. Finally, our study may lack statistical power due to small sample  
310 sizes in strata and the low power of tests for interactions (53). We were unable to account for  
311 grandchild's sex in our models assessing the impact of grandmother's smoking in pregnancy since  
312 that is unavailable in UK Biobank, which may also reduce our statistical power. MR studies with  
313 larger sample sizes and hence greater statistical power are needed to further investigate  
314 transgenerational effects of smoking heaviness, together with studies in which both maternal and  
315 offspring genotype are known.

316 *Conclusion*

317 G×E MR demonstrates how offspring genotype can be used to proxy for maternal genotype to  
318 investigate causal effects of maternal smoking heaviness in pregnancy when maternal genotype is  
319 unavailable. We demonstrated our proxy G×E approach by replicating the previously identified effect  
320 of heavier smoking on lower offspring birthweight. We found little evidence of a causal effect of  
321 maternal smoking heaviness on offspring's later life outcomes. Finally, we found evidence that the  
322 effect of grandmother's smoking in pregnancy on grandchild's birthweight may be modulated by  
323 mother's smoking status in pregnancy. Further studies with larger sample sizes are needed to  
324 improve statistical power.



325 **Acknowledgments**

326 This research has been conducted using the UK Biobank Resource under Application Number 16729  
327 (dataset ID 11148 and 21753).

328 **Footnotes**

329 **Contributors:** QY contributed to the design of the study, performed all analyses, wrote the first  
330 version of the manuscript, critically reviewed and revised the manuscript and approved the final  
331 version of the manuscript as submitted. LACM contributed to the design of the study, critically  
332 reviewed and revised the manuscript and approved the final version of the manuscript as submitted.  
333 GDS conceptualized the study, contributed to the design of the study, critically reviewed and revised  
334 the manuscript and approved the final version of the manuscript as submitted. GDS is the guarantor.  
335 The corresponding author attests that all listed authors meet authorship criteria and that no others  
336 meeting the criteria have been omitted.

337 **Funding:** This work was supported by the University of Bristol and UK Medical Research Council  
338 [grant number MC\_UU\_12013/1]. LACM is funded by a University of Bristol Vice-Chancellor's  
339 Fellowship. QY is funded by a China Scholarship Council PhD Scholarship. The funders had no role in  
340 the design, analyses, interpretation of results, writing of the paper, or decision of publication.

341 **Competing interests:** All authors have completed the ICMJE uniform disclosure form at  
342 [www.icmje.org/coi\\_disclosure.pdf](http://www.icmje.org/coi_disclosure.pdf) and declare: no support from any organization for the submitted  
343 work other than detailed above; no financial relationships with any organisations that might have an  
344 interest in the submitted work in the previous three years; no other relationships or activities that  
345 could appear to have influenced the submitted work.

346 **Ethical approval:** The UK Biobank received ethical approval from the research ethics committee (REC  
347 reference for UK Biobank 11/NW/0382) and participants provided written informed consent.

348 **Data sharing:** The data reported in this paper are available by applying directly to the UK Biobank. All  
349 code used to produce the results can be accessed at [https://github.com/MRCIEU/MR-maternal-](https://github.com/MRCIEU/MR-maternal-smoking)  
350 [smoking](#). Git tag v0.1 corresponds to the version presented here.

351 **Transparency:** The lead author (the manuscript's guarantor) affirms that this manuscript is an  
352 honest, accurate, and transparent account of the study being reported; that no important aspects of  
353 the study have been omitted; and that any discrepancies from the study as originally planned (and, if  
354 relevant, registered) have been explained.

355 This is an Open Access article distributed in accordance with the terms of the Creative Commons  
356 Attribution (CC BY 4.0) license, which permits others to distribute, remix, adapt and build upon this  
357 work, for commercial use, provided the original work is properly cited.

358 See: <http://creativecommons.org/licenses/by/4.0/>.

## 359 References

- 360 1.Sharp GC, Lawlor DA, Richardson SS. It's the mother!: How assumptions about the causal primacy  
361 of maternal effects influence research on the developmental origins of health and disease. *Soc Sci*  
362 *Med* 2018;213:20-7. doi: 10.1016/j.socscimed.2018.07.035
- 363 2.Davey Smith G. Negative control exposures in epidemiologic studies. *Epidemiology* 2012;23:350-1;  
364 author reply 1-2. doi: 10.1097/EDE.0b013e318245912c
- 365 3.Tyrrell J, Huikari V, Christie JT, *et al.* Genetic variation in the 15q25 nicotinic acetylcholine receptor  
366 gene cluster (CHRNA5-CHRNA3-CHRNA4) interacts with maternal self-reported smoking status  
367 during pregnancy to influence birth weight. *Hum Mol Genet* 2012;21:5344-58. doi:  
368 10.1093/hmg/dds372
- 369 4.Rice F, Harold GT, Boivin J, Hay DF, van den Bree M, Thapar A. Disentangling prenatal and inherited  
370 influences in humans with an experimental design. *Proc Natl Acad Sci U S A* 2009;106:2464-7. doi:  
371 10.1073/pnas.0808798106
- 372 5.Davey Smith G. Assessing intrauterine influences on offspring health outcomes: can  
373 epidemiological studies yield robust findings? *Basic Clin Pharmacol Toxicol* 2008;102:245-56. doi:  
374 10.1111/j.1742-7843.2007.00191.x
- 375 6.Krieger N, Davey Smith G. The tale wagged by the DAG: broadening the scope of causal inference  
376 and explanation for epidemiology. *Int J Epidemiol* 2016;45:1787-808. doi: 10.1093/ije/dyw114
- 377 7.Howe LD, Matijasevich A, Tilling K, *et al.* Maternal smoking during pregnancy and offspring  
378 trajectories of height and adiposity: comparing maternal and paternal associations. *Int J Epidemiol*  
379 2012;41:722-32. doi: 10.1093/ije/dys025
- 380 8.Riedel C, Schonberger K, Yang S, *et al.* Parental smoking and childhood obesity: higher effect  
381 estimates for maternal smoking in pregnancy compared with paternal smoking--a meta-analysis. *Int*  
382 *J Epidemiol* 2014;43:1593-606. doi: 10.1093/ije/dyu150
- 383 9.Albers L, Sobotzki C, Kuss O, *et al.* Maternal smoking during pregnancy and offspring overweight: is  
384 there a dose-response relationship? An individual patient data meta-analysis. *Int J Obes (Lond)*  
385 2018;42:1249-64. doi: 10.1038/s41366-018-0050-0
- 386 10.Brion MJ, Leary SD, Lawlor DA, Davey Smith G, Ness AR. Modifiable maternal exposures and  
387 offspring blood pressure: a review of epidemiological studies of maternal age, diet, and smoking.  
388 *Pediatr Res* 2008;63:593-8. doi: 10.1203/PDR.0b013e31816fddb3
- 389 11.Chen Y, Liu Q, Li W, Deng X, Yang B, Huang X. Association of prenatal and childhood environment  
390 smoking exposure with puberty timing: a systematic review and meta-analysis. *Environ Health Prev*  
391 *Med* 2018;23:33. doi: 10.1186/s12199-018-0722-3
- 392 12.Jayes L, Haslam PL, Gratziau CG, *et al.* SmokeHaz: Systematic Reviews and Meta-analyses of the  
393 Effects of Smoking on Respiratory Health. *Chest* 2016;150:164-79. doi: 10.1016/j.chest.2016.03.060
- 394 13.Clifford A, Lang L, Chen R. Effects of maternal cigarette smoking during pregnancy on cognitive  
395 parameters of children and young adults: a literature review. *Neurotoxicol Teratol* 2012;34:560-70.  
396 doi: 10.1016/j.ntt.2012.09.004

- 397 14. Tiesler CM, Heinrich J. Prenatal nicotine exposure and child behavioural problems. *Eur Child*  
398 *Adolesc Psychiatry* 2014;23:913-29. doi: 10.1007/s00787-014-0615-y
- 399 15. Ding M, Yuan C, Gaskins AJ, *et al.* Smoking during pregnancy in relation to grandchild birth weight  
400 and BMI trajectories. *PLoS One* 2017;12:e0179368. doi: 10.1371/journal.pone.0179368
- 401 16. Miller LL, Pembrey M, Davey Smith G, Northstone K, Golding J. Is the growth of the fetus of a non-  
402 smoking mother influenced by the smoking of either grandmother while pregnant? *PLoS One*  
403 2014;9:e86781. doi: 10.1371/journal.pone.0086781
- 404 17. Hypponen E, Davey Smith G, Power C. Effects of grandmothers' smoking in pregnancy on birth  
405 weight: intergenerational cohort study. *BMJ* 2003;327:898. doi: 10.1136/bmj.327.7420.898
- 406 18. Macdonald-Wallis C, Tobias JH, Davey Smith G, Lawlor DA. Parental smoking during pregnancy  
407 and offspring bone mass at age 10 years: findings from a prospective birth cohort. *Osteoporos Int*  
408 2011;22:1809-19. doi: 10.1007/s00198-010-1415-y
- 409 19. Brion MJ, Leary SD, Davey Smith G, Ness AR. Similar associations of parental prenatal smoking  
410 suggest child blood pressure is not influenced by intrauterine effects. *Hypertension* 2007;49:1422-8.  
411 doi: 10.1161/hypertensionaha.106.085316
- 412 20. Leary SD, Brion MJ, Lawlor DA, Smith GD, Ness AR. Lack of emergence of associations between  
413 selected maternal exposures and offspring blood pressure at age 15 years. *J Epidemiol Community*  
414 *Health* 2013;67:320-6. doi: 10.1136/jech-2012-201784
- 415 21. Taylor AE, Carslake D, de Mola CL, *et al.* Maternal Smoking in Pregnancy and Offspring  
416 Depression: a cross cohort and negative control study. *Sci Rep* 2017;7:12579. doi: 10.1038/s41598-  
417 017-11836-3
- 418 22. Davey Smith G, Lawlor DA, Harbord R, Timpson N, Day I, Ebrahim S. Clustered environments and  
419 randomized genes: a fundamental distinction between conventional and genetic epidemiology. *PLoS*  
420 *Med* 2007;4:e352. doi: 10.1371/journal.pmed.0040352
- 421 23. Davey Smith G, Ebrahim S. 'Mendelian randomization': can genetic epidemiology contribute to  
422 understanding environmental determinants of disease? *Int J Epidemiol* 2003;32:1-22. doi:
- 423 24. Davey Smith G. Use of genetic markers and gene-diet interactions for interrogating population-  
424 level causal influences of diet on health. *Genes Nutr* 2011;6:27-43. doi: 10.1007/s12263-010-0181-y
- 425 25. Spiller W, Slichter D, Bowden J, Davey Smith G. Detecting and correcting for bias in Mendelian  
426 randomization analyses using Gene-by-Environment interactions. *Int J Epidemiol* 2018. doi:  
427 10.1093/ije/dyy204
- 428 26. Munafo MR, Timofeeva MN, Morris RW, *et al.* Association between genetic variants on  
429 chromosome 15q25 locus and objective measures of tobacco exposure. *J Natl Cancer Inst*  
430 2012;104:740-8. doi: 10.1093/jnci/djs191
- 431 27. Freathy RM, Kazeem GR, Morris RW, *et al.* Genetic variation at CHRNA5-CHRNA3-CHRNA4  
432 interacts with smoking status to influence body mass index. *Int J Epidemiol* 2011;40:1617-28. doi:  
433 10.1093/ije/dyr077

- 434 28.Linneberg A, Jacobsen RK, Skaaby T, *et al.* Effect of Smoking on Blood Pressure and Resting Heart  
435 Rate: A Mendelian Randomization Meta-Analysis in the CARTA Consortium. *Circ Cardiovasc Genet*  
436 2015;8:832-41. doi: 10.1161/circgenetics.115.001225
- 437 29.Millard LAC, Munafo M, Tilling K, Wootton RE, Davey Smith G. MR-pheWAS with stratification and  
438 interaction: Searching for the causal effects of smoking heaviness identified an effect on facial aging.  
439 *bioRxiv* 2018. doi: 10.1101/441907
- 440 30.Kvalvik LG, Skjaerven R, Klungsoyr K, Vollset SE, Haug K. Can 'early programming' be partly  
441 explained by smoking? Results from a prospective, population-based cohort study. *Paediatr Perinat*  
442 *Epidemiol* 2015;29:50-9. doi: 10.1111/ppe.12164
- 443 31.Liu JZ, Erlich Y, Pickrell JK. Case-control association mapping by proxy using family history of  
444 disease. *Nat Genet* 2017;49:325-31. doi: 10.1038/ng.3766
- 445 32.Sudlow C, Gallacher J, Allen N, *et al.* UK biobank: an open access resource for identifying the  
446 causes of a wide range of complex diseases of middle and old age. *PLoS Med* 2015;12:e1001779. doi:  
447 10.1371/journal.pmed.1001779
- 448 33.Mitchell R, Hemani G, Dudding T, Paternoster L. UK Biobank Genetic Data: MRC-IEU Quality  
449 Control, Version 1. 06 Nov 2017. <https://data.bris.ac.uk/data/dataset/3074krb6t2frj29yh2b03x3wxj>.
- 450 34.Zhu Z, Lee PH, Chaffin MD, *et al.* A genome-wide cross-trait analysis from UK Biobank highlights  
451 the shared genetic architecture of asthma and allergic diseases. *Nat Genet* 2018;50:857-64. doi:  
452 10.1038/s41588-018-0121-0
- 453 35.Okbay A, Beauchamp JP, Fontana MA, *et al.* Genome-wide association study identifies 74 loci  
454 associated with educational attainment. *Nature* 2016;533:539-42. doi: 10.1038/nature17671
- 455 36.Hill WD, Marioni RE, Maghzian O, *et al.* A combined analysis of genetically correlated traits  
456 identifies 187 loci and a role for neurogenesis and myelination in intelligence. *Mol Psychiatry*  
457 2019;24:169-81. doi: 10.1038/s41380-017-0001-5
- 458 37.Howard DM, Adams MJ, Shiralil M, *et al.* Genome-wide association study of depression  
459 phenotypes in UK Biobank identifies variants in excitatory synaptic pathways. *Nat Commun*  
460 2018;9:1470. doi: 10.1038/s41467-018-03819-3
- 461 38.Tanner JM, Whitehouse RH, Takaishi M. Standards from birth to maturity for height, weight,  
462 height velocity, and weight velocity: British children, 1965. I. *Arch Dis Child* 1966;41:454-71. doi:  
463 10.1136/adc.41.7.454
- 463 39.Knezevic A. StatNews # 73: Overlapping Confidence Intervals and Statistical Significance. Oct  
464 2008. <https://www.cscu.cornell.edu/news/statnews/stnews73.pdf>.
- 465 40.Munafo MR, Tilling K, Taylor AE, Evans DM, Davey Smith G. Collider scope: when selection bias  
466 can substantially influence observed associations. *Int J Epidemiol* 2018;47:226-35. doi:  
467 10.1093/ije/dyx206
- 468 41.Taylor AE, Davies NM, Ware JJ, VanderWeele T, Smith GD, Munafo MR. Mendelian randomization  
469 in health research: using appropriate genetic variants and avoiding biased estimates. *Econ Hum Biol*  
470 2014;13:99-106. doi: 10.1016/j.ehb.2013.12.002

- 471 42.Colak Y, Afzal S, Lange P, Nordestgaard BG. Smoking, Systemic Inflammation, and Airflow  
472 Limitation: A Mendelian Randomization Analysis of 98 085 Individuals from the General Population.  
473 *Nicotine Tob Res* 2018. doi: 10.1093/ntr/nty077
- 474 43.Skaaby T, Taylor AE, Jacobsen RK, *et al.* Investigating the causal effect of smoking on hay fever  
475 and asthma: a Mendelian randomization meta-analysis in the CARTA consortium. *Sci Rep*  
476 2017;7:2224. doi: 10.1038/s41598-017-01977-w
- 477 44.Magnus MC, Henderson J, Tilling K, Howe LD, Fraser A. Independent and combined associations  
478 of maternal and own smoking with adult lung function and COPD. *Int J Epidemiol* 2018;47:1855-64.  
479 doi: 10.1093/ije/dyy221
- 480 45.Silvestri M, Franchi S, Pistorio A, Petecchia L, Rusconi F. Smoke exposure, wheezing, and asthma  
481 development: a systematic review and meta-analysis in unselected birth cohorts. *Pediatr Pulmonol*  
482 2015;50:353-62. doi: 10.1002/ppul.23037
- 483 46.Accordini S, Calciano L, Johannessen A, *et al.* A three-generation study on the association of  
484 tobacco smoking with asthma. *Int J Epidemiol* 2018;47:1106-17. doi: 10.1093/ije/dyy031
- 485 47.Menezes AM, Murray J, Laszlo M, *et al.* Happiness and depression in adolescence after maternal  
486 smoking during pregnancy: birth cohort study. *PLoS One* 2013;8:e80370. doi:  
487 10.1371/journal.pone.0080370
- 488 48.Hutcheon JA, Chiolero A, Hanley JA. Random measurement error and regression dilution bias.  
489 *Bmj* 2010;340:c2289. doi: 10.1136/bmj.c2289
- 490 49.Swanson JM. The UK Biobank and selection bias. *Lancet* 2012;380:110. doi: 10.1016/s0140-  
491 6736(12)61179-9
- 492 50.Hughes RA, Davies NM, Davey Smith G, Tilling K. Selection bias in instrumental variable analyses.  
493 *BioRxiv* 2018. doi: 10.1101/192237
- 494 51.Gkatzionis A, Burgess S. Contextualizing selection bias in Mendelian randomization: how bad is it  
495 likely to be? *Int J Epidemiol* 2018. doi: 10.1093/ije/dyy202
- 496 52.Lawlor D, Richmond R, Warrington N, *et al.* Using Mendelian randomization to determine causal  
497 effects of maternal pregnancy (intrauterine) exposures on offspring outcomes: Sources of bias and  
498 methods for assessing them. *Wellcome Open Res* 2017;2:11. doi:  
499 10.12688/wellcomeopenres.10567.1
- 500 53.Marshall SW. Power for tests of interaction: effect of raising the Type I error rate. *Epidemiol*  
501 *Perspect Innov* 2007;4:4. doi: 10.1186/1742-5573-4-4
- 502 54.Pearl J, Glymour M, Jewell NP. Causal inference in statistics A Primer: John Wiley & Sons Ltd,  
503 2016.
- 504

505 **Figure 1. Directed acyclic graphs (DAGs) of this study**

506 **(A)**

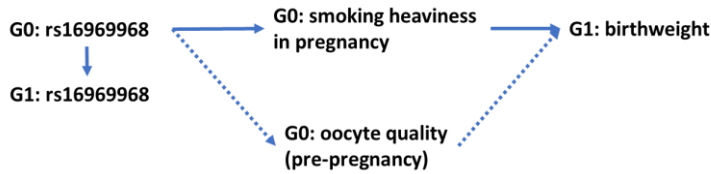

507

508 **(B)**

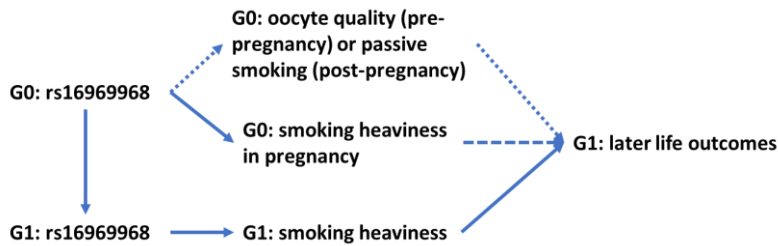

509

510 **(C)**

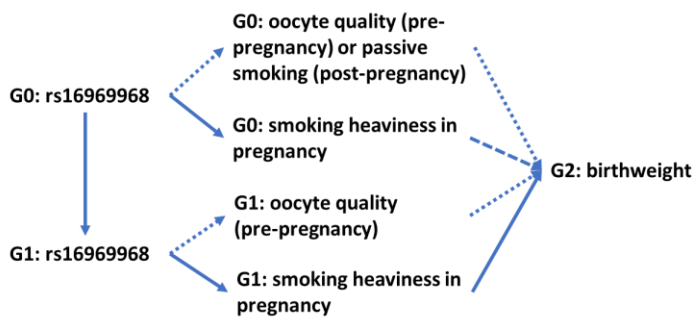

511

512 Generation (G)0: UK Biobank participants' mother; G1: UK Biobank participants themselves; G2: First  
513 offspring of UK Biobank participants.

514 A) Assessing the effect of G0 smoking heaviness on G1 birthweight: We used G1 rs16969968 as a  
515 proxy for G0 rs16969968 and stratified on G0 smoking status in pregnancy. There is no backdoor  
516 path (54) via G1 smoking heaviness since G1 cannot smoke before they were born. Maternal  
517 smoking outside of pregnancy might influence the outcome (52), e.g. via oocyte quality, causing an  
518 alternate path between rs16969968 and G1 birthweight (shown as .....▶ ).

519 B) Assessing the effect of G0 smoking on G1 later life outcomes: Besides the paths described in (A),  
520 there is a backdoor path from G1 rs16969968 via G1 life-course smoking heaviness to the outcomes.  
521 To estimate the effect of G0 smoking heaviness in pregnancy (shown as - - - -▶ ), we need to block  
522 this backdoor path by further stratifying on G1 smoking status.

523 C) Assessing the effect of G0 smoking on G2 birthweight: Besides the paths described in (A), there is  
524 a backdoor path from G1 rs16969968 via G1 smoking heaviness in pregnancy to the outcomes. To  
525 estimate the effect of G0 smoking heaviness in pregnancy (shown as - - - -▶ ), we need to block this  
526 backdoor path by further stratifying on G1 smoking status in pregnancy. G1 pre-pregnancy smoking  
527 might influence G2 birthweight (shown as .....▶ ).

528 See further DAGs in the Supplementary Figure 2 illustrating potential sources of bias due to  
529 conditioning on a collider.

530 **Figure 2. The associations of rs16969968 of UK Biobank participants with their own birthweight by their mothers' smoking status during pregnancy**

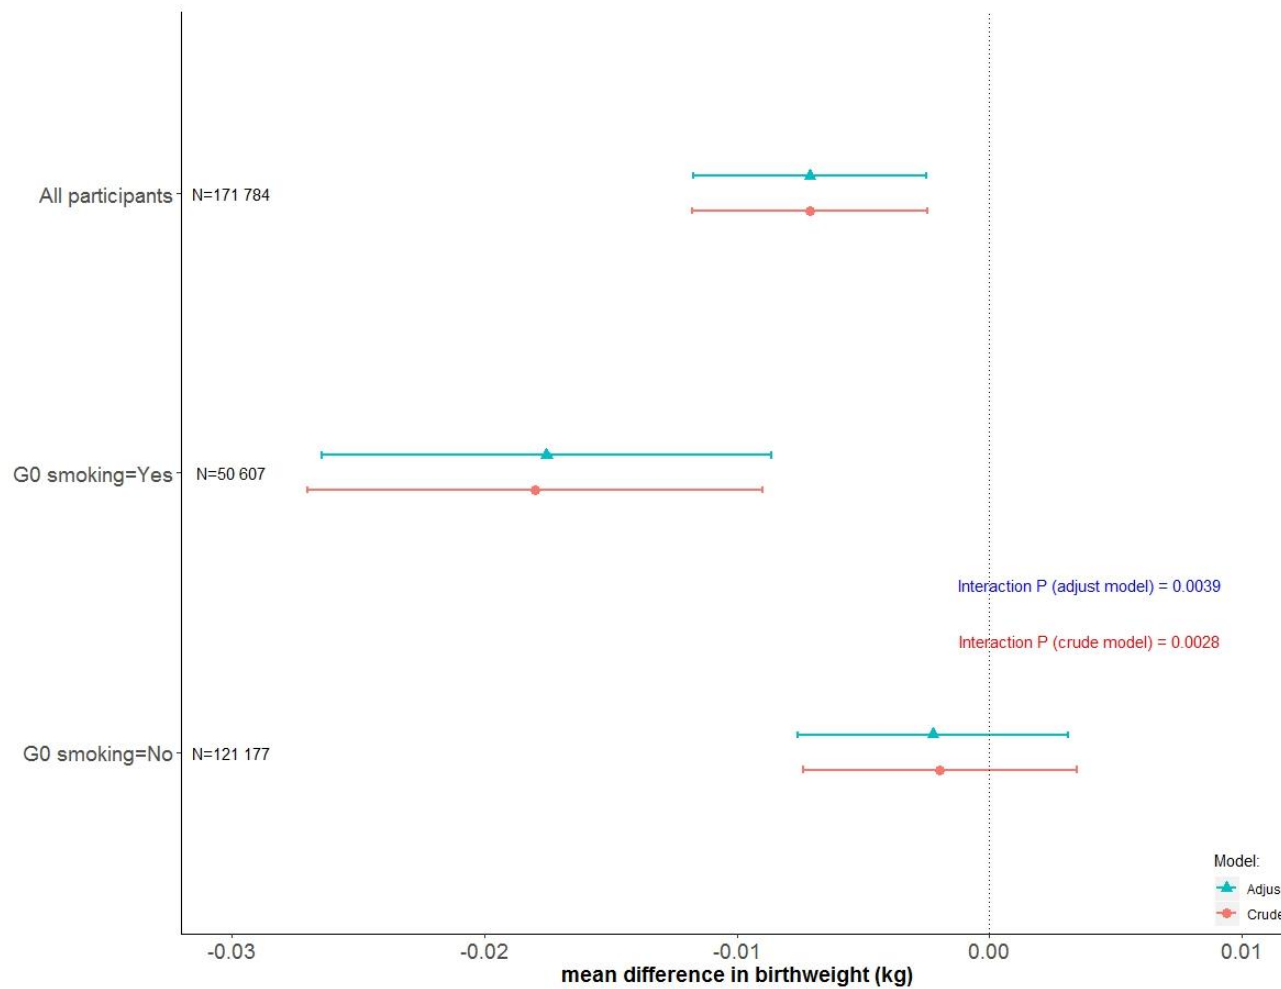

531

532 Generation (G)0: UK Biobank participants' mother; G1: UK Biobank participants themselves. Estimates are the mean difference of G1 birthweight per each  
533 smoking-heaviness increasing allele of rs16969968. Associations are adjusted for sex of participants and the first ten principal components. The number of  
534 participants was listed for each analysis.



535 **Figure 3. The associations of rs16969968 with 12 outcomes in UK Biobank participants by their mothers' smoking status during pregnancy and their own**  
 536 **smoking status**

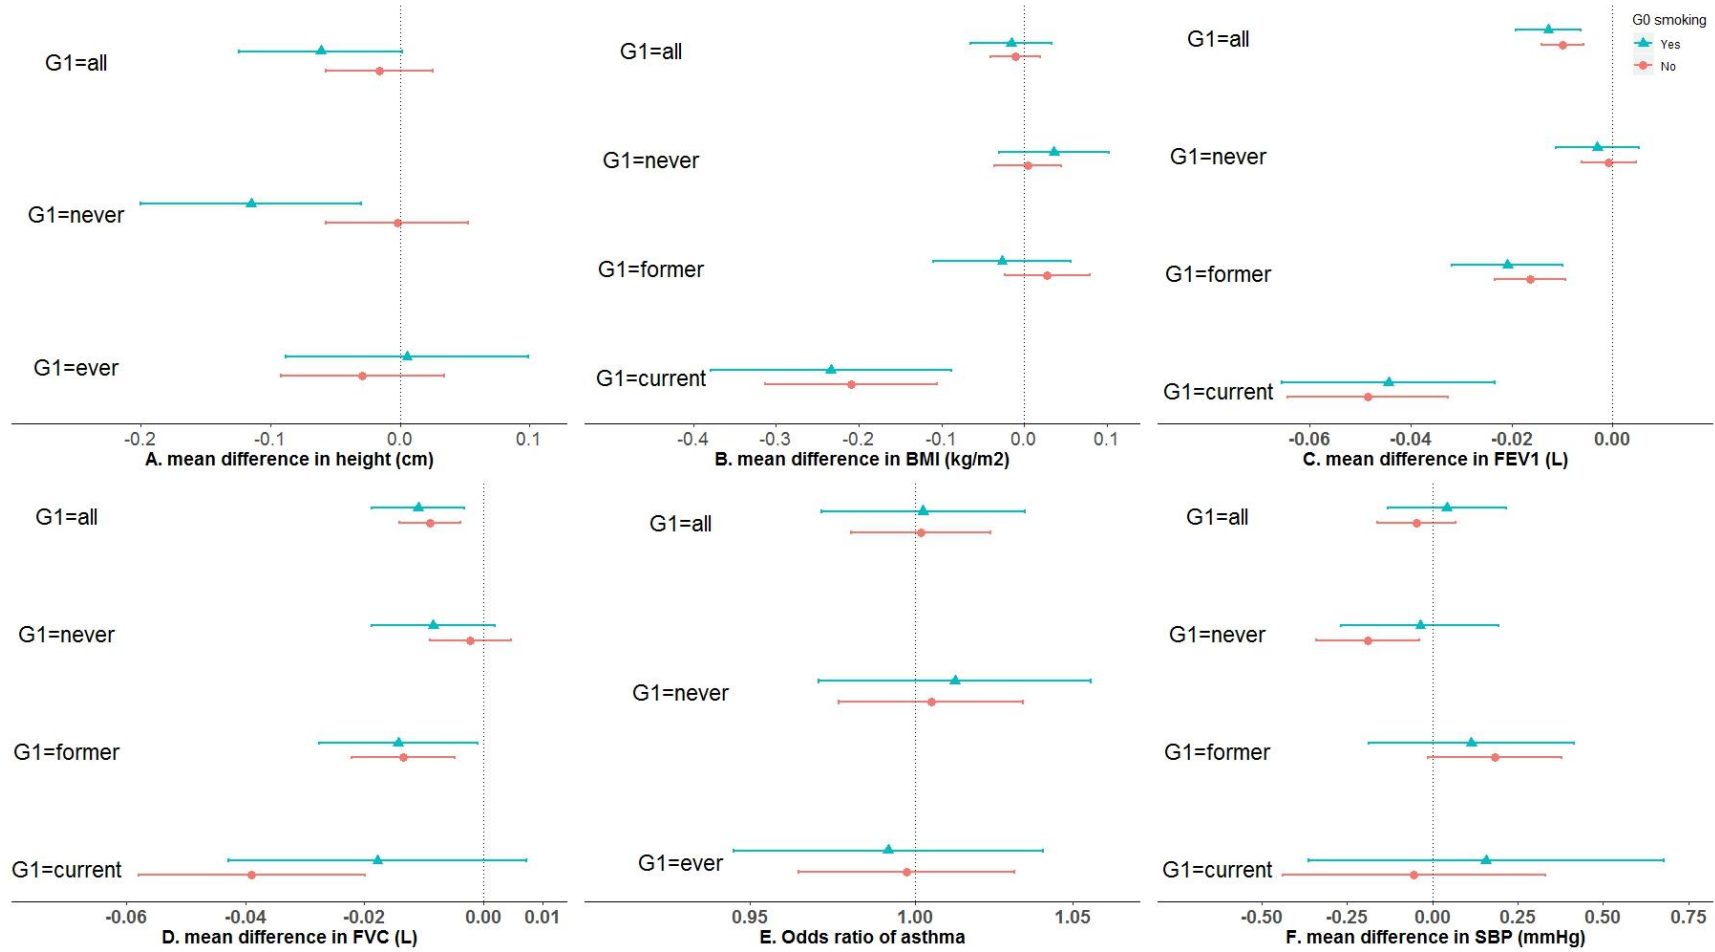

537

538

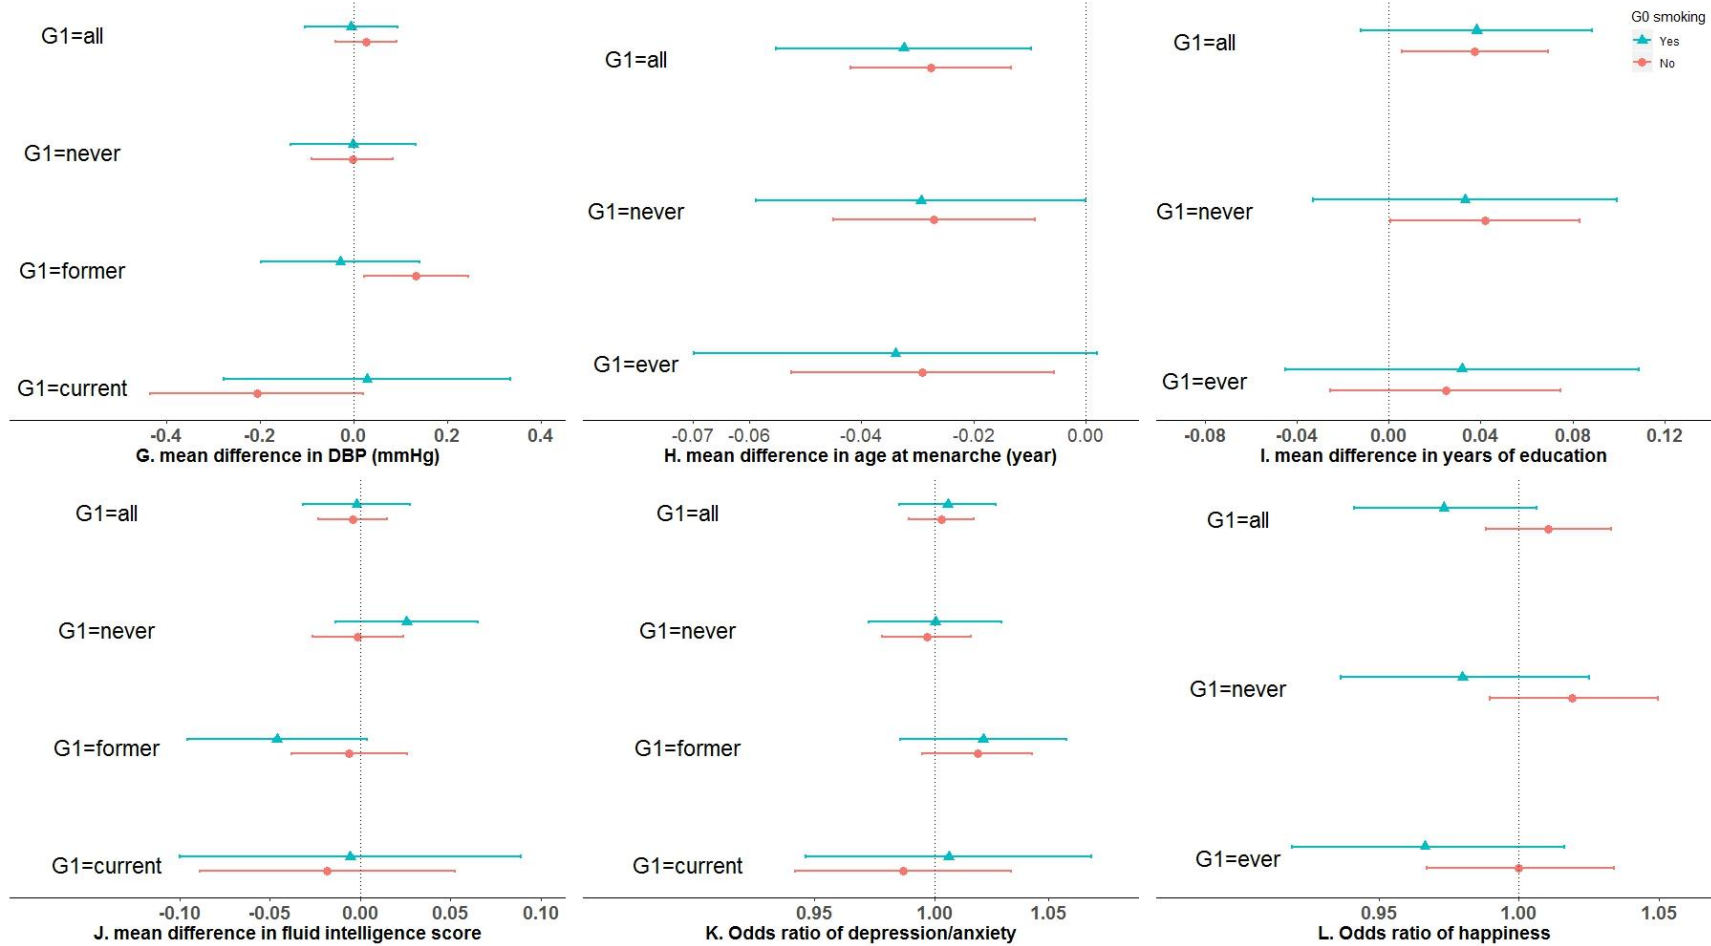

539

540 Generation (G)0: UK Biobank participants' mother; G1: UK Biobank participants themselves. Estimates are the mean difference (or change in odds) of G1  
 541 outcome per each smoking-heaviness increasing allele of rs16969968. We adjusted for age and sex of participants for outcomes except for menarche, and  
 542 the first ten principal components for all 12 outcomes. We combined G1 current and former smokers into ever smokers for height, menarche, education,  
 543 asthma and happiness to enlarge sample sizes given smoking cessation may not have a rapid impact on them.  
 544 Abbreviations: BMI, body mass index, DBP, diastolic blood pressure; FEV<sub>1</sub>, forced expiratory volume in 1-second; FVC, forced vital capacity; SBP, systolic  
 545 blood pressure.

546 **Figure 4. The associations of rs16969968 of UK Biobank women participants with their first child's birthweight by their mothers' and their own smoking**  
 547 **status during pregnancy, after adjusting for the first ten genetic principal components**

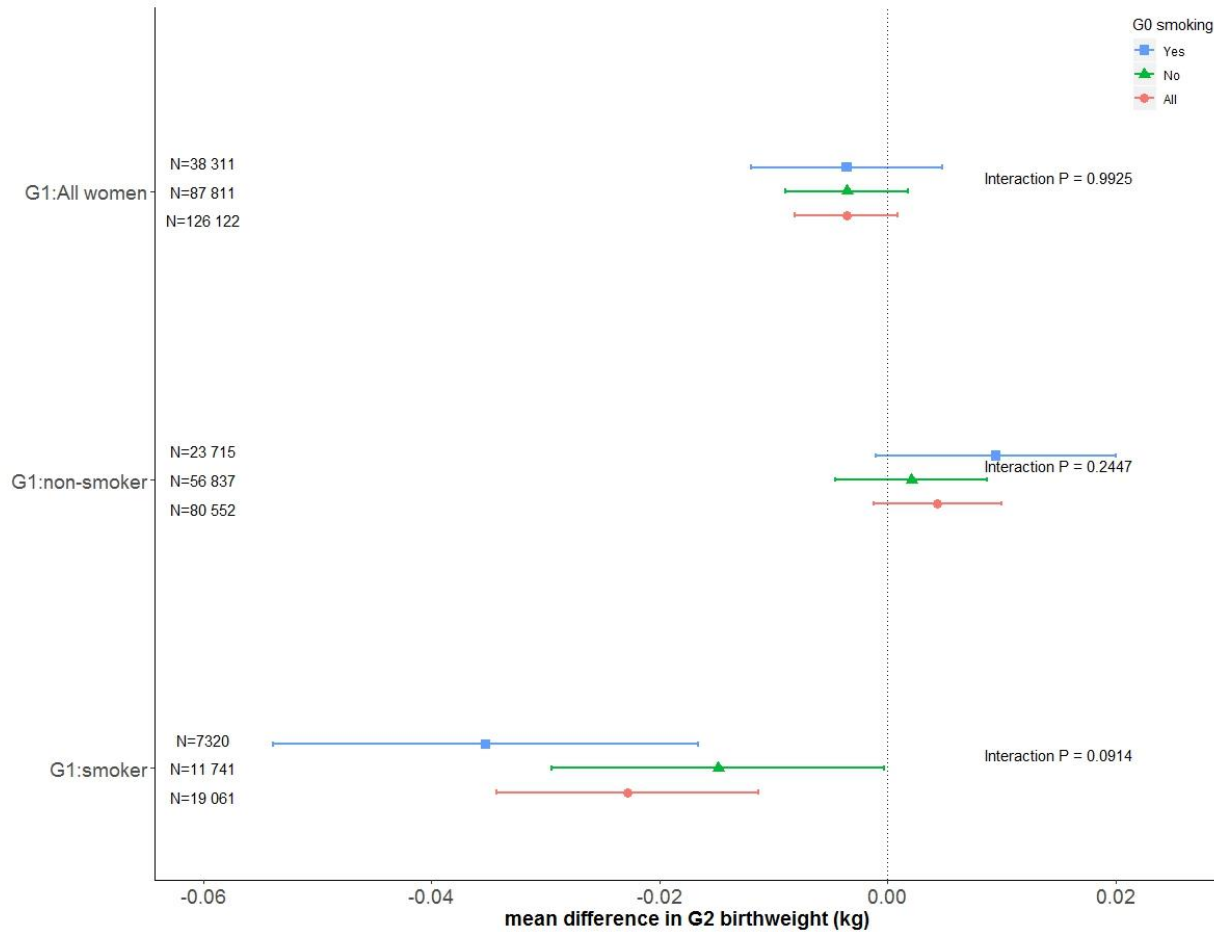

548

549 Generation (G)0: UK Biobank participants' mother; G1: UK Biobank participants themselves; G2: First offspring of UK Biobank participants. Estimates are the  
 550 mean difference of G2 birthweight per each smoking-heaviness increasing allele of rs16969968. Interactions are tested between G0 smokers (blue line) and  
 551 non-smokers (green line) with their P-values presented. All women in G1 included G1 smokers, G1 non-smokers and G1 women whose smoking status in  
 552 pregnancy was missing.
